# Supplementary material
Source: Springer Nature journal article supplement (https://www.springermedizin.de/resource/supplementary/12876_2011_610_MOESM1_ESM.pdf/9437362)
Supplement: MOESM1 [file 9437362]

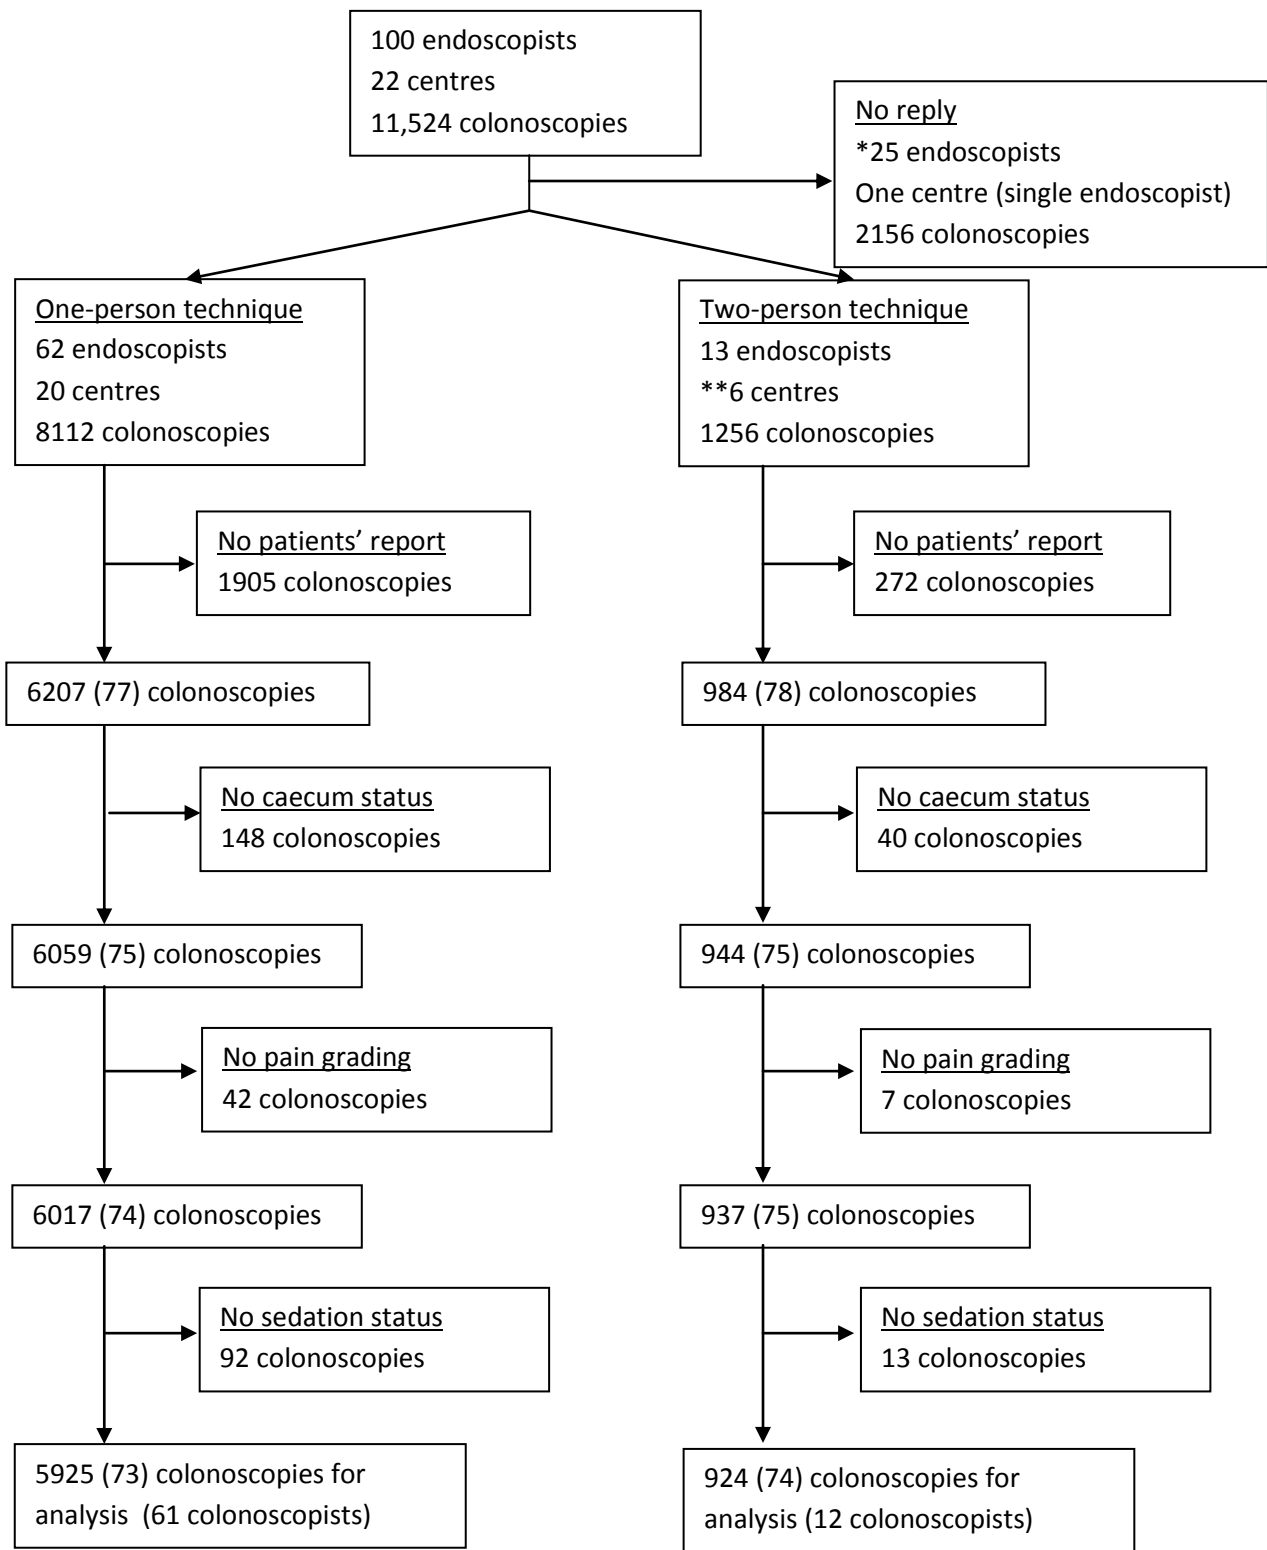

\*Including endoscopist at centre with single endoscopist, \*\*Both techniques applied in 5 out of a total of 21 centres responding to the survey
